# Supplementary material for: C151 in KEAP1 is the main cysteine sensor for the cyanoenone class of NRF2 activators, irrespective of molecular size or shape
Source: PubMed Central journal article supplement (PMC5966396; doi:10.1038/s41598-018-26269-9), 2018-05-23

## **Supplementary Information**

**C151 in KEAP1 is the main cysteine sensor for the cyanoenone class of NRF2 activators, irrespective of molecular size or shape**

Sharadha Dayalan Naidu, Aki Muramatsu, Ryota Saito, Soichiro Asami, Tadashi Honda, Tomonori Hosoya, Ken Itoh, Masayuki Yamamoto, Takafumi Suzuki, and Albena T. Dinkova-Kostova

This figure contains all full-length blots.

FIG 2A

Nrf2

HA

a-tubulin

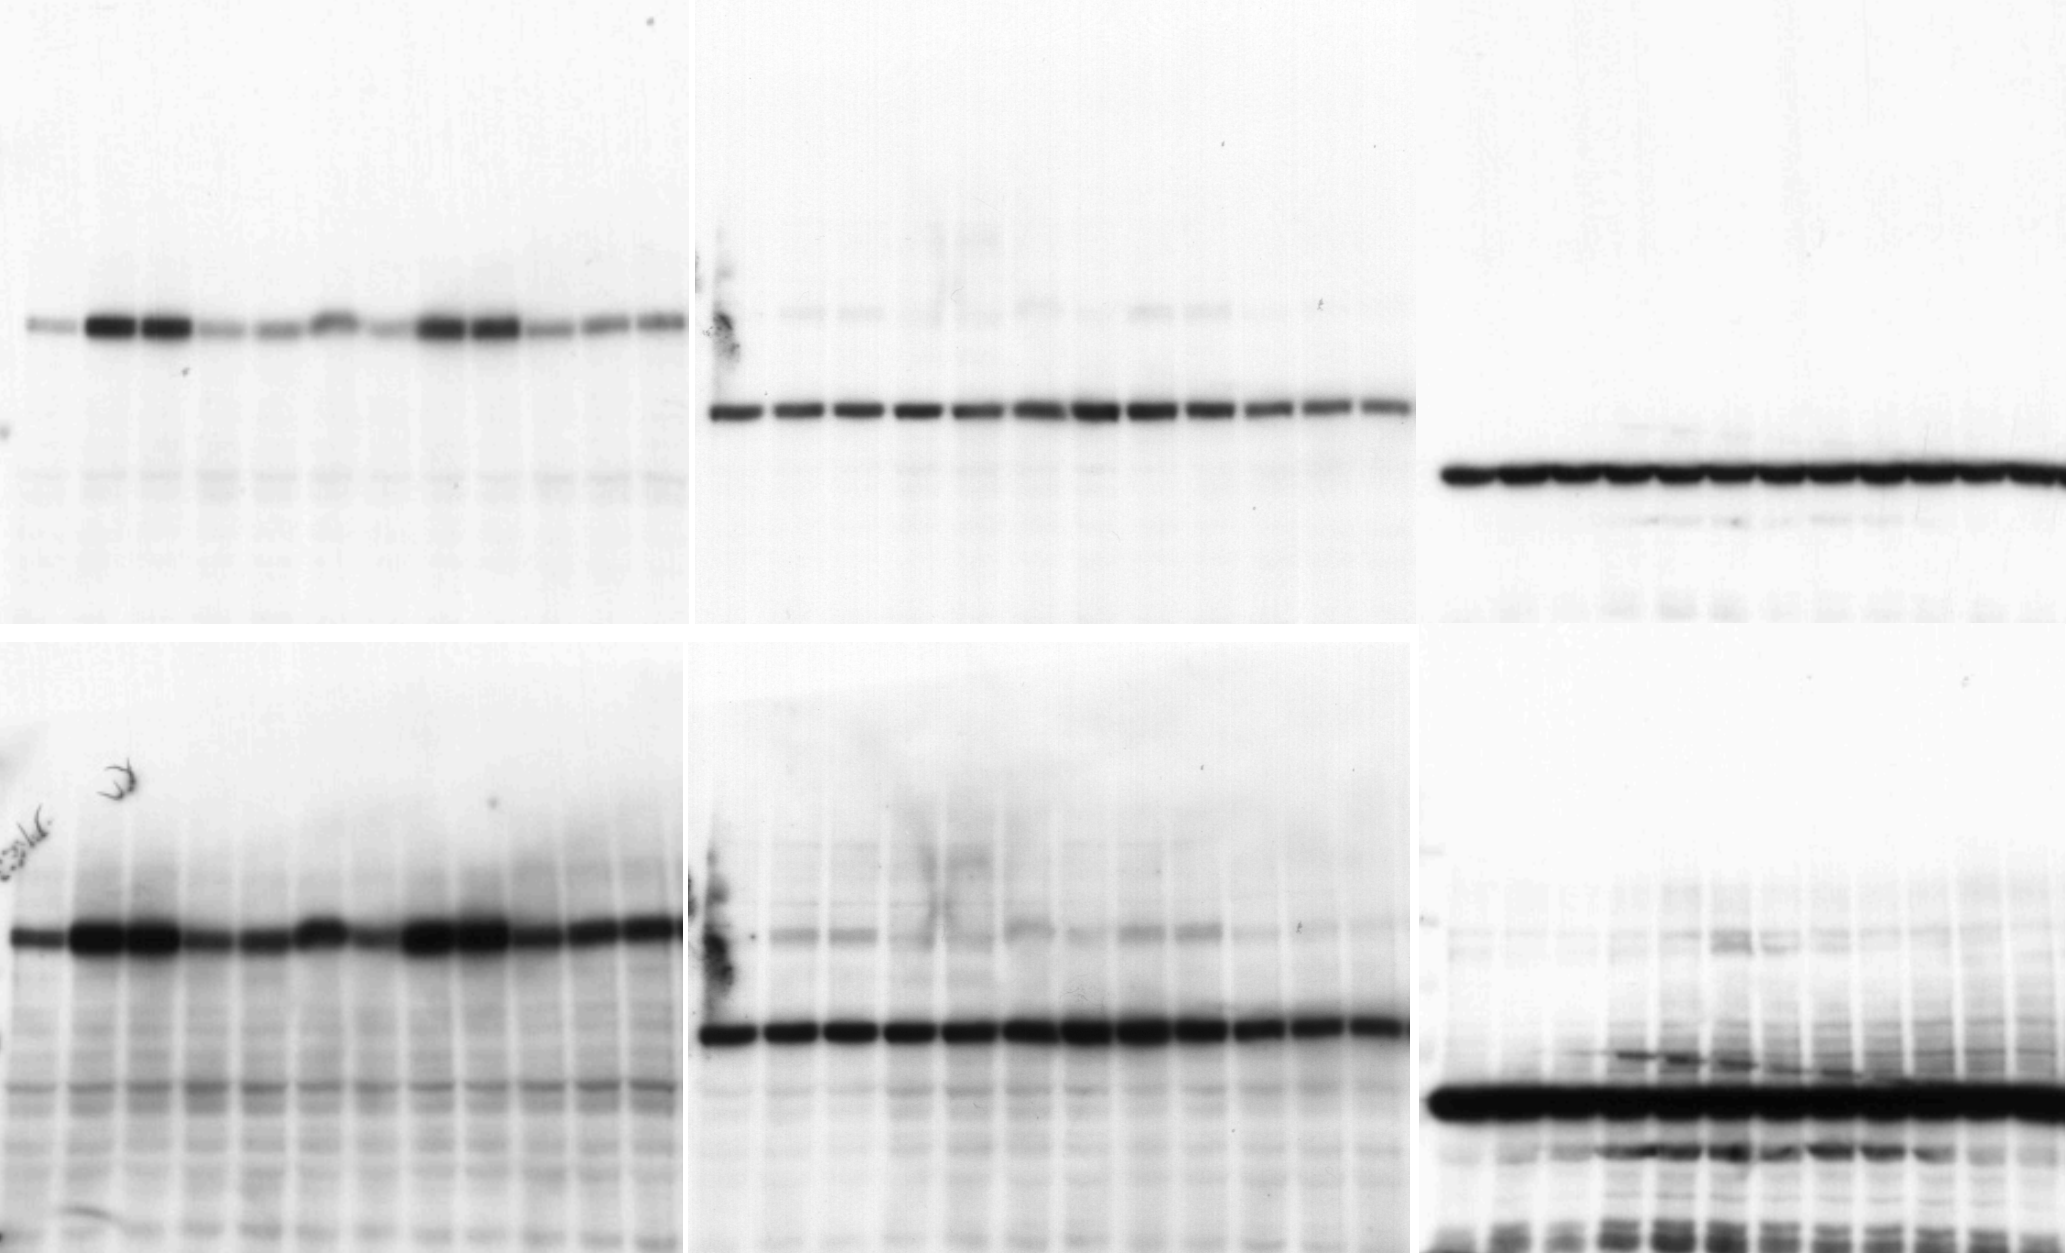

FIG 2B

Nrf2

HA

a-tubulin

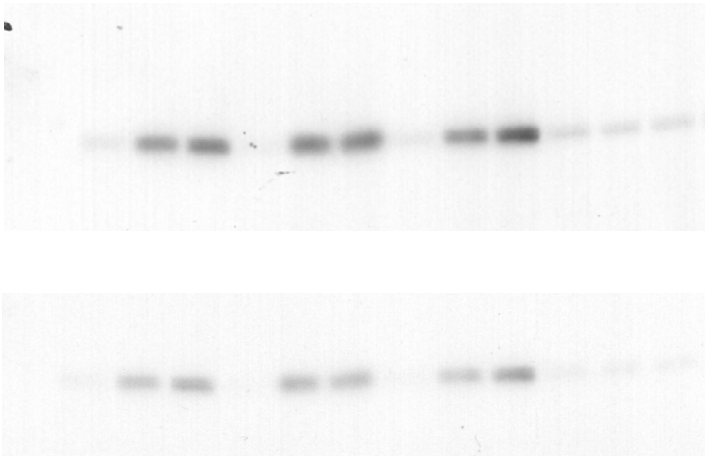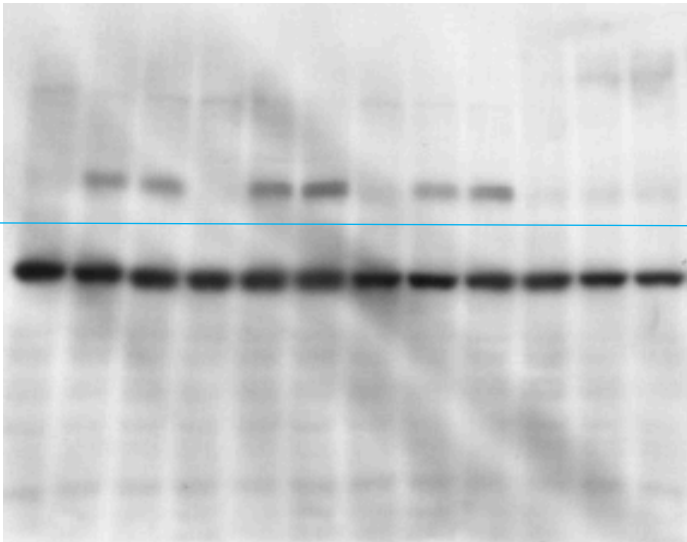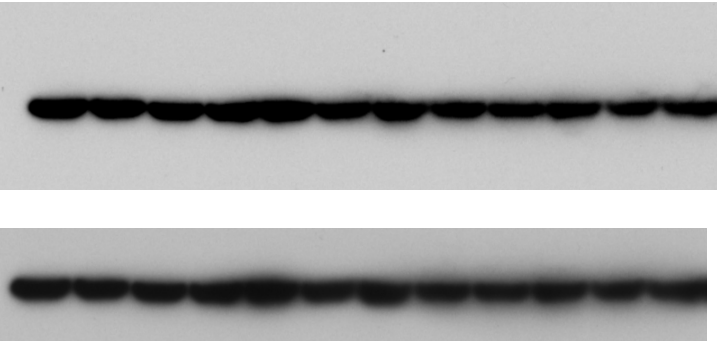

FIG 3A

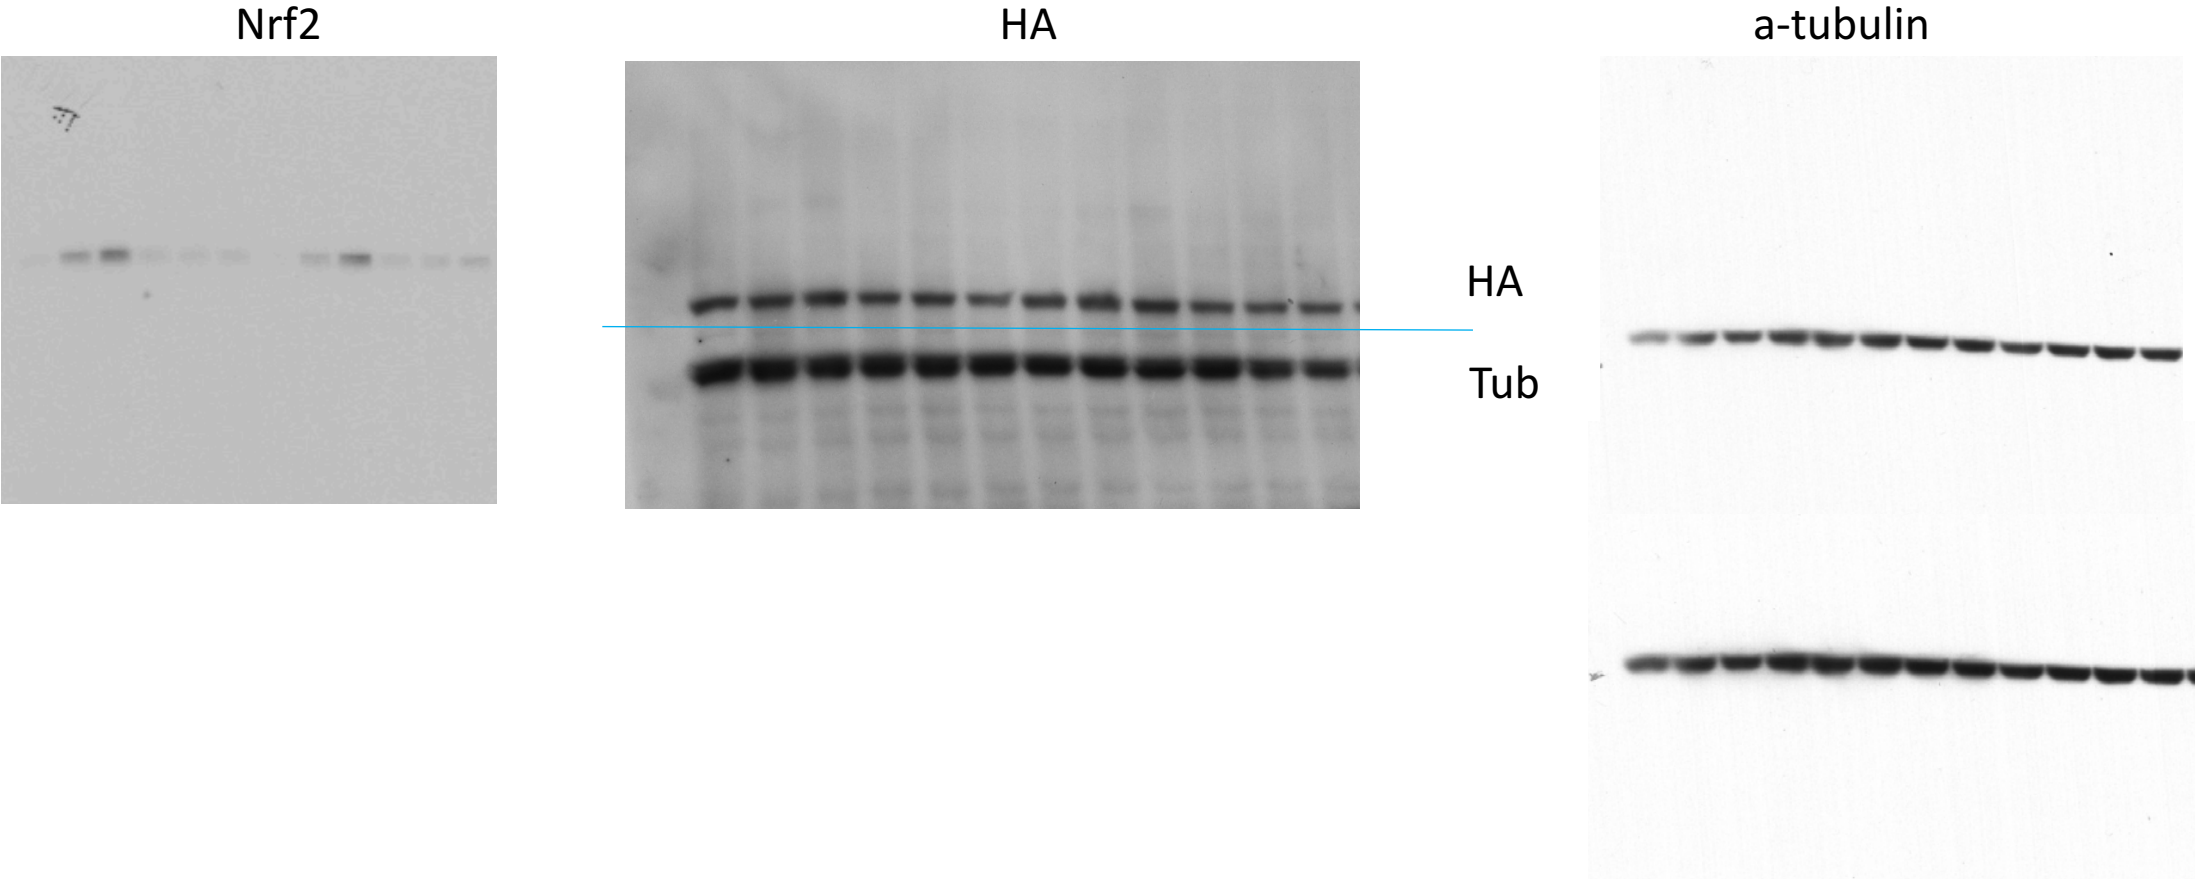

FIG 3B

Nrf2

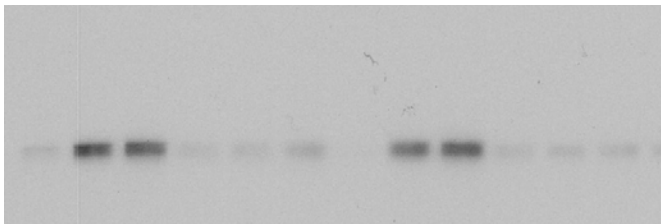

HA

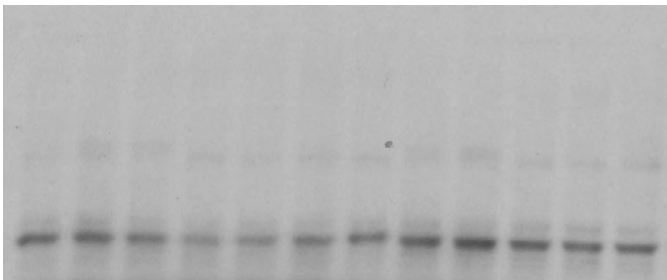

a-tubulin

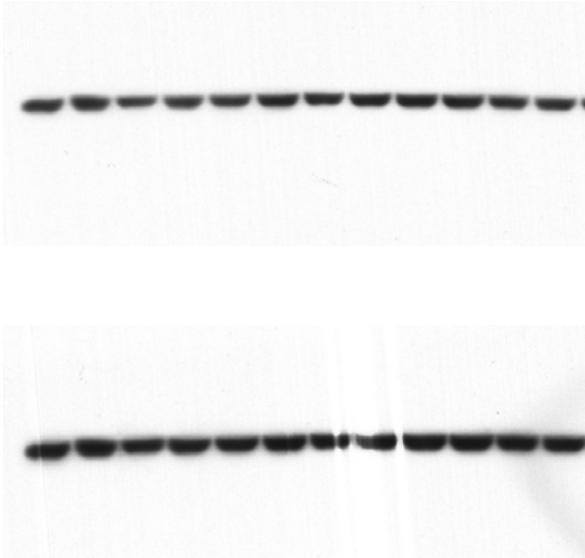

FIG 4A

Nrf2

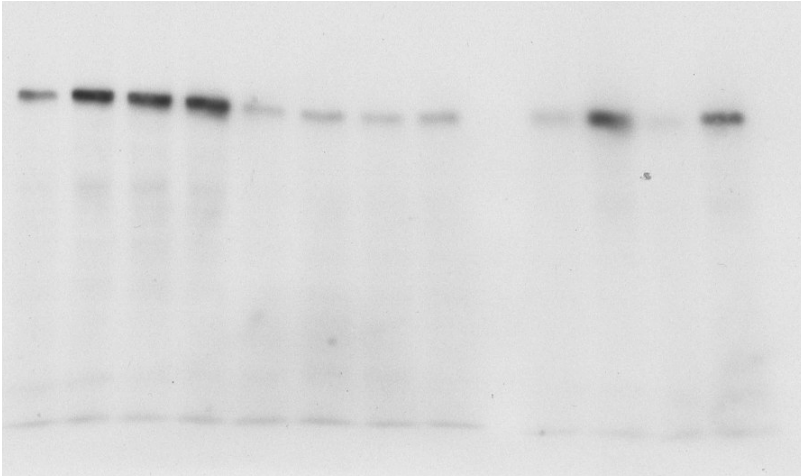

Keap1

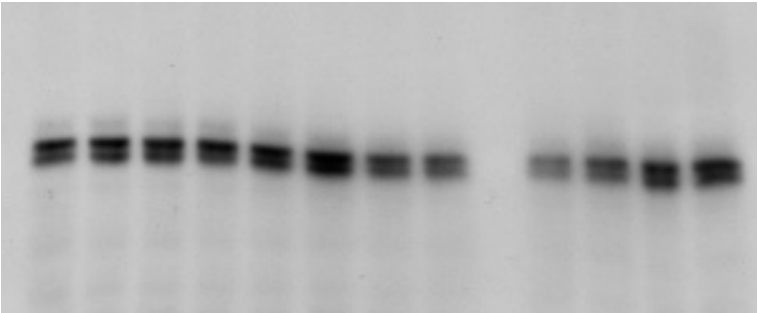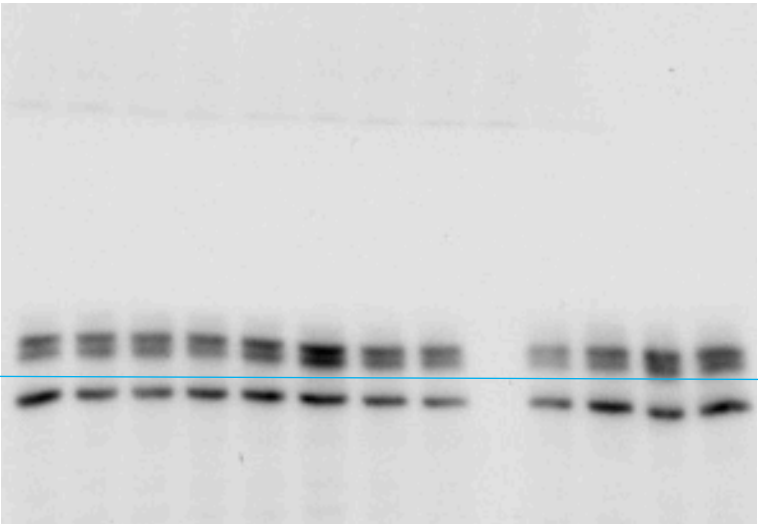

Keap1

FIG 4B

Nrf2

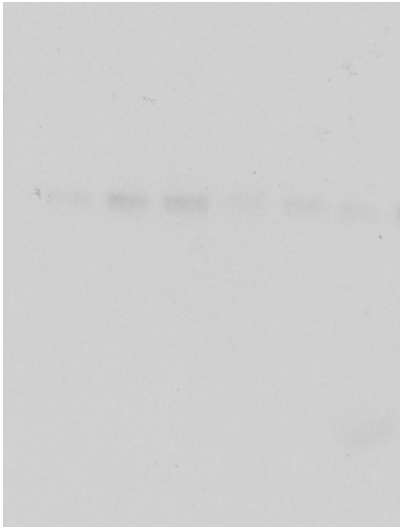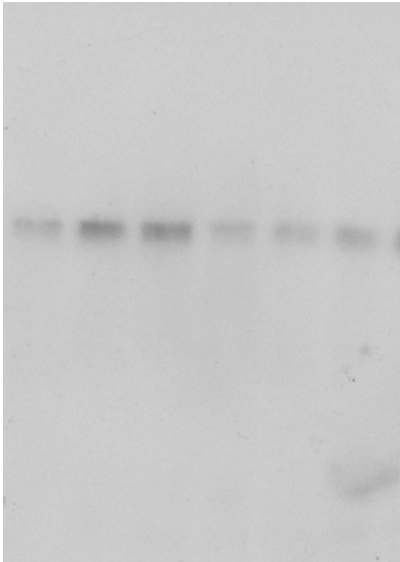

Keap1

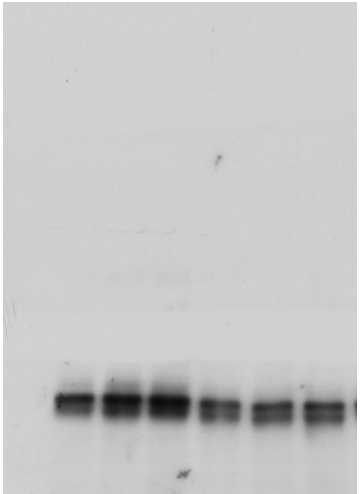

FIG 5A

Nrf2

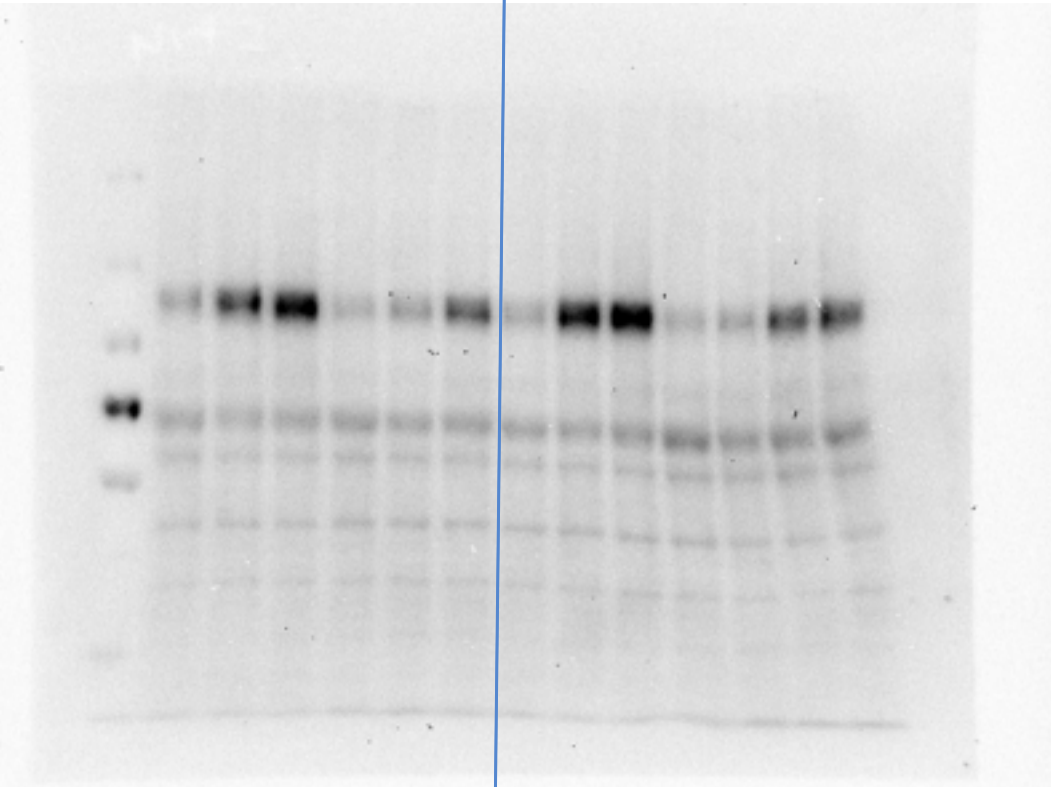

a-tubulin

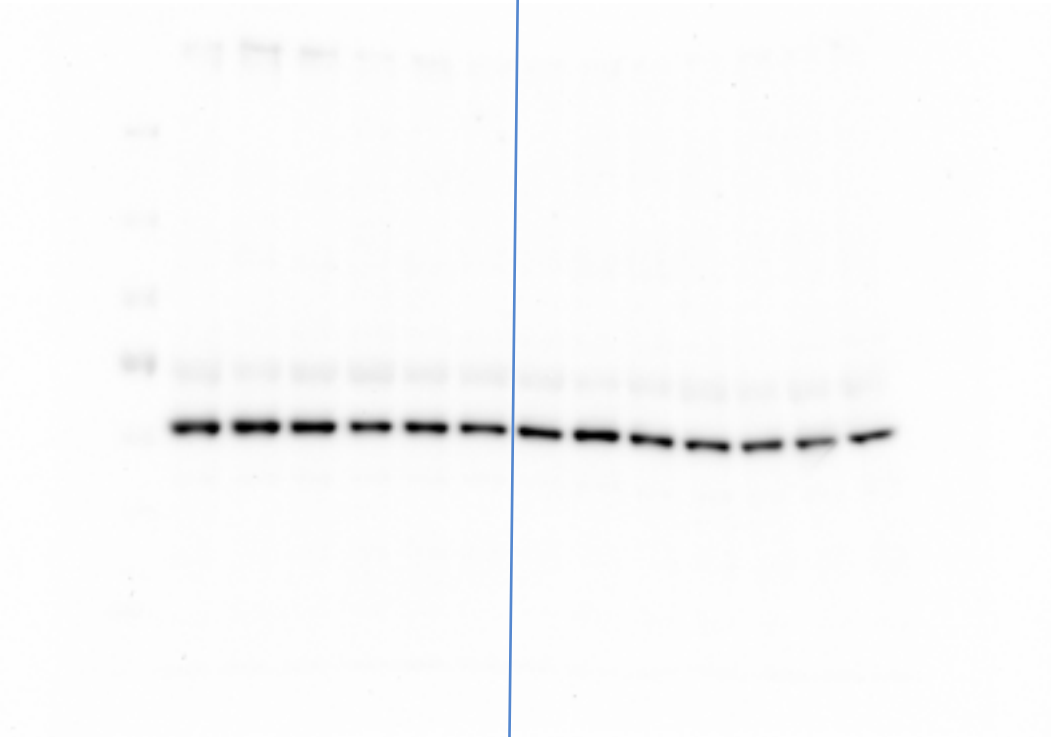

Supplement: 41598_2018_26269_MOESM1_ESM.pdf [file 41598_2018_26269_MOESM1_ESM.pdf]
